# Supplementary material for: A Positive Causal Effect of Shrimp Allergy on Major Depressive Disorder Mediated by Allergy- and Immune-Related Pathways in the East Asian Population
Source: MDPI journal article supplement (doi:10.3390/nu16010079), 2023-12-26
Supplement: s1 [file s1]

**Supplementary Table S1. Overall MR analyses with strong genetic instruments ( $P < 5 \times 10^{-6}$ ) for causal effects of SA on MDD.**

| Exposure | Outcome | N of SNPs<br>in MRA <sup>a</sup> | MR<br>p-value <sup>b</sup>              | MR Method <sup>c</sup> | OR   | 95%LCI | 95%UCI |
|----------|---------|----------------------------------|-----------------------------------------|------------------------|------|--------|--------|
| SA       | MDD     | 6                                | <b><math>1.76 \times 10^{-2}</math></b> | Weighted median        | 1.07 | 1.01   | 1.14   |
|          |         |                                  | <b><math>5.01 \times 10^{-3}</math></b> | Random-effects IVW     | 1.07 | 1.02   | 1.12   |
|          |         |                                  | <b><math>5.01 \times 10^{-3}</math></b> | Fixed-effects IVW      | 1.07 | 1.02   | 1.12   |
|          |         |                                  | <b><math>8.50 \times 10^{-3}</math></b> | RAPS                   | 1.07 | 1.02   | 1.12   |

<sup>a</sup> N of SNPs in MRA: number of independent genetic SNPs used in the MR analysis for each pair of exposure and outcome; <sup>b</sup> MR p-value: p-value of the most suitable MR method; <sup>c</sup> MR Method: the most suitable MR analysis used in MR analysis. 95%LCI: 95% lower confidence interval; 95%UCI: 95% upper confidence interval; IVW, inverse-variance weighted; RAPS, Robust Adjusted Profile Score.
